# Supplementary material for: A Projection of Environmental Impact of a Low Emission Zone Planned in Warsaw, Poland
Source: Preprints.org preprint supplement (doi:10.20944/preprints202310.1086.v1), 2023-10-17
Supplement: Supplementary file 3 [file supplementary]

**Supplementary material**


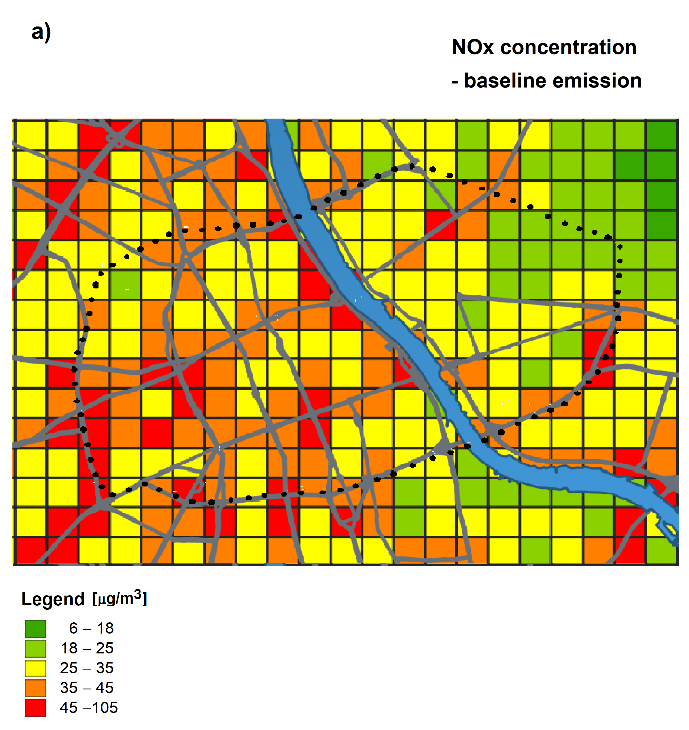

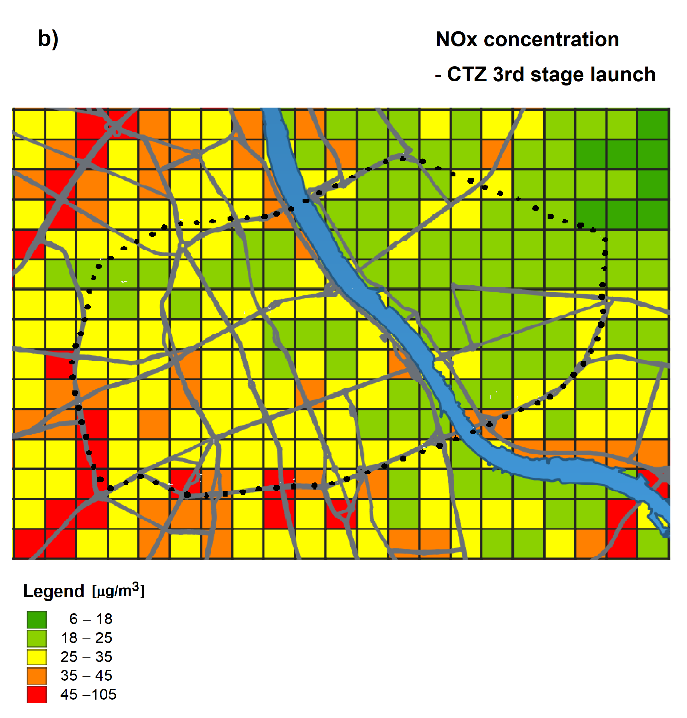

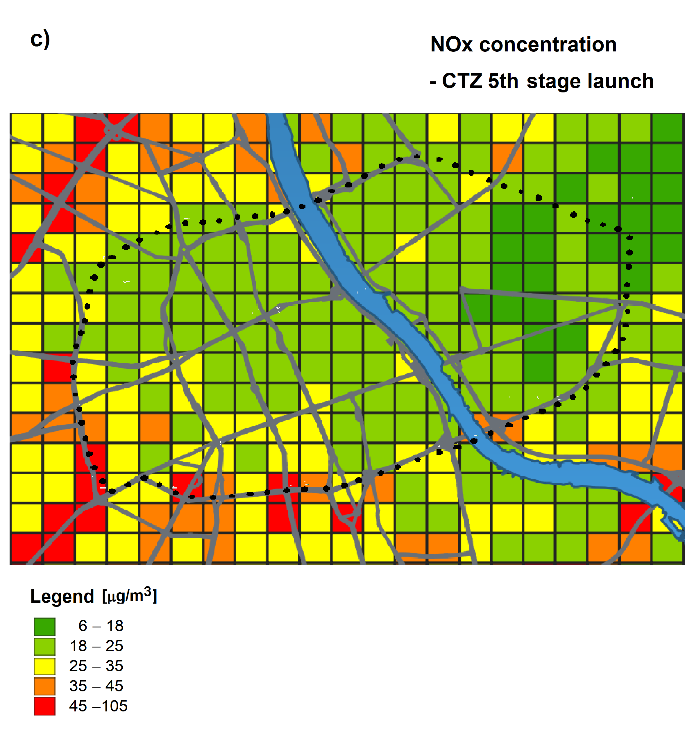

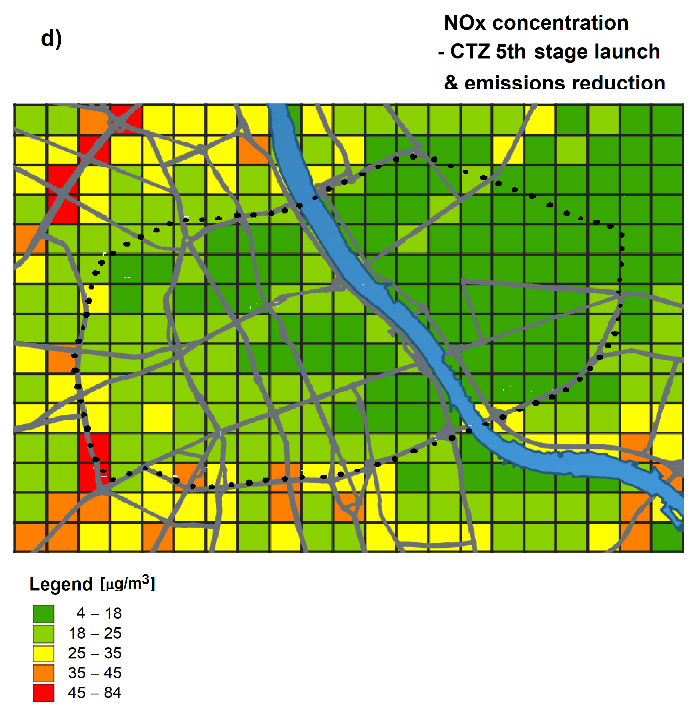


**Figure S1**. NOx concentration map inside LEZ: (a) baseline emission, (b) 3rd stage LEZ,
 (c) 5th stage LEZ, (d) 5th stage LEZ+25% total emissions reduction.
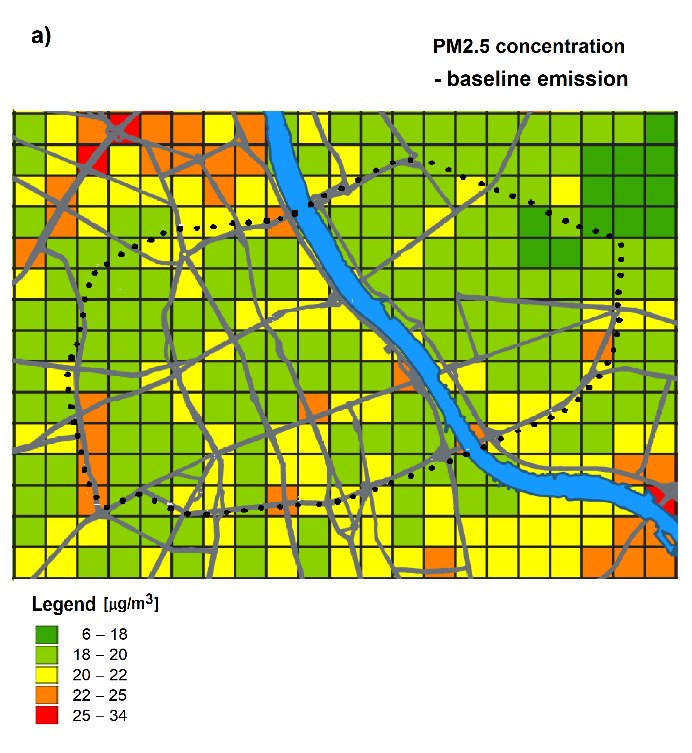

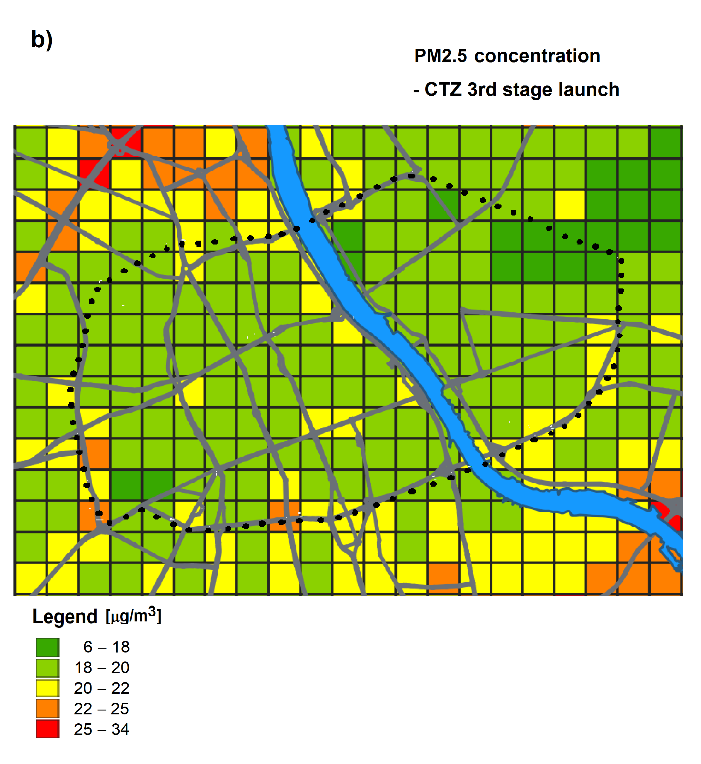

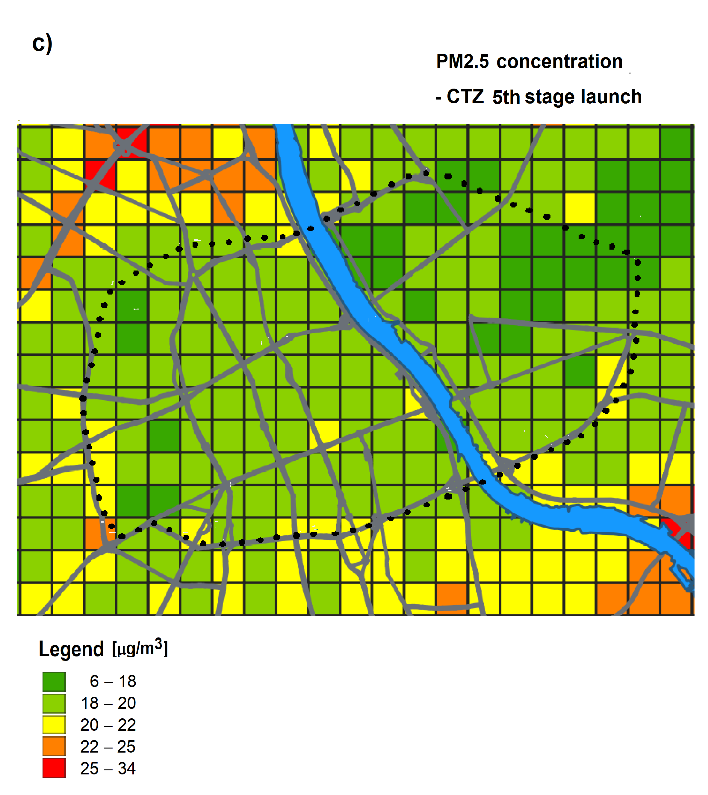

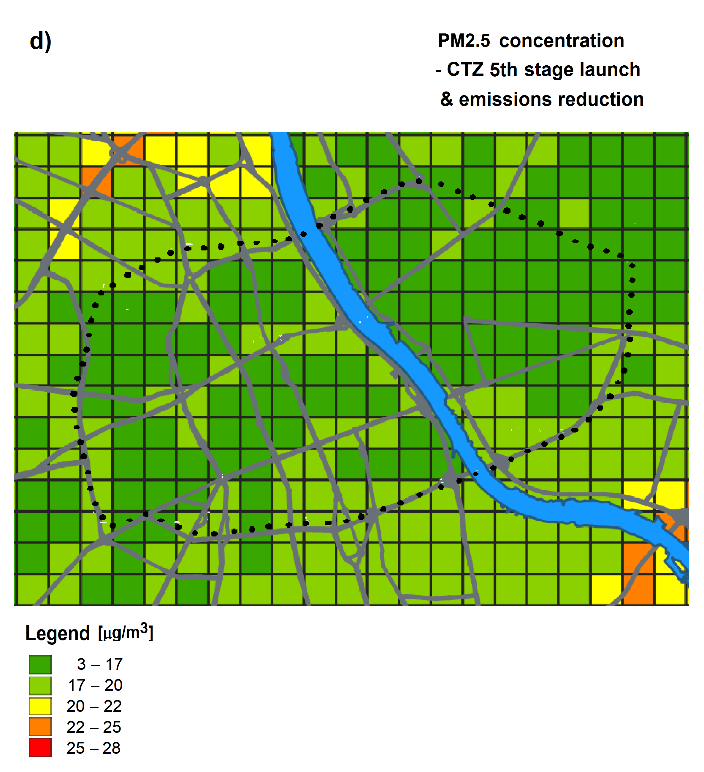


**Figure S2**. PM2.5 concentration map inside LEZ: (a) baseline emission, (b) 3rd stage LEZ,
 (c) 5th stage LEZ, (d) 5th stage LEZ+25% total emissions reduction.
